# Supplementary material for: Radiation dose reduction using deep learning-based image reconstruction for a low-dose chest computed tomography protocol: a phantom study
Source: PubMed Central journal article supplement — Quant Imaging Med Surg. 2023 Feb 1;13(3):1937–47. doi: 10.21037/qims-22-618 (PMC10006148; doi:10.21037/qims-22-618), 2023-02-01
Supplement: qims-13-03-1937-supplementary.pdf [file qims-13-03-1937-supplementary.pdf]

**Table S1** Visual grading analysis results from four radiologists

| Nodule type | Tube input*     | ASiR-V      |             |             | DLIR        |             |             |
|-------------|-----------------|-------------|-------------|-------------|-------------|-------------|-------------|
|             |                 | 30          | 50          | 70          | Low         | Medium      | High        |
| Solid       | 70 kVp, 20 mAs  | 2.75 [2, 3] | 3.50 [3, 4] | 3.75 [3, 5] | 4.00 [3, 5] | 4.25 [4, 5] | 5.00 [5, 5] |
| Solid       | 70 kVp, 50 mAs  | 3.00 [3, 3] | 3.50 [3, 4] | 4.25 [4, 5] | 4.00 [4, 5] | 4.75 [4, 5] | 5.00 [5, 5] |
| Solid       | 80 kVp, 20 mAs  | 3.50 [3, 4] | 3.75 [3, 4] | 4.50 [4, 5] | 3.00 [3, 3] | 4.25 [4, 5] | 4.75 [4, 5] |
| Solid       | 80 kVp, 50 mAs  | 3.25 [3, 4] | 3.25 [3, 4] | 4.50 [4, 5] | 3.75 [3, 5] | 5.00 [5, 5] | 4.75 [4, 5] |
| Solid       | 100 kVp, 20 mAs | 3.75 [3, 4] | 3.25 [3, 4] | 4.25 [4, 5] | 4.00 [3, 5] | 5.00 [5, 5] | 4.75 [4, 5] |
| Solid       | 100 kVp, 50 mAs | 3.50 [3, 4] | 4.00 [4, 4] | 4.25 [4, 5] | 3.75 [3, 4] | 4.75 [4, 5] | 4.75 [4, 5] |
| Solid       | 120 kVp, 20 mAs | 3.00 [3, 3] | 3.50 [3, 4] | 3.75 [3, 4] | 4.25 [4, 5] | 4.75 [4, 5] | 4.75 [4, 5] |
| Solid       | 120 kVp, 50 mAs | 3.50 [3, 4] | 3.75 [3, 4] | 4.25 [4, 5] | 4.25 [4, 5] | 4.75 [4, 5] | 4.75 [4, 5] |
| Sub-solid   | 70 kVp, 20 mAs  | 3.50 [3, 4] | 3.25 [2, 4] | 3.50 [3, 4] | 3.00 [3, 3] | 4.50 [4, 5] | 5.00 [5, 5] |
| Sub-solid   | 70 kVp, 50 mAs  | 3.75 [3, 4] | 3.75 [3, 4] | 4.00 [4, 4] | 3.50 [3, 4] | 4.50 [4, 5] | 5.00 [5, 5] |
| Sub-solid   | 80 kVp, 20 mAs  | 3.75 [3, 4] | 3.75 [3, 5] | 4.25 [4, 5] | 3.25 [3, 4] | 4.00 [3, 5] | 5.00 [5, 5] |
| Sub-solid   | 80 kVp, 50 mAs  | 3.50 [3, 4] | 4.00 [3, 5] | 4.00 [4, 4] | 4.25 [4, 5] | 4.25 [3, 5] | 5.00 [5, 5] |
| Sub-solid   | 100 kVp, 20 mAs | 3.50 [3, 4] | 3.50 [3, 4] | 4.25 [4, 5] | 4.00 [4, 4] | 4.50 [4, 5] | 5.00 [5, 5] |
| Sub-solid   | 100 kVp, 50 mAs | 3.75 [3, 4] | 4.25 [4, 5] | 4.25 [4, 5] | 4.00 [4, 4] | 4.75 [4, 5] | 4.75 [4, 5] |
| Sub-solid   | 120 kVp, 20 mAs | 3.50 [3, 4] | 4.00 [4, 4] | 4.50 [4, 5] | 3.50 [3, 4] | 4.25 [4, 5] | 5.00 [5, 5] |
| Sub-solid   | 120 kVp, 50 mAs | 4.00 [4, 4] | 4.00 [3, 5] | 4.00 [4, 4] | 4.25 [4, 5] | 5.00 [5, 5] | 4.75 [4, 5] |
| Pure        | 70 kVp, 20 mAs  | 3.75 [3, 4] | 3.75 [3, 4] | 3.75 [3, 4] | 4.25 [4, 5] | 3.50 [3, 4] | 4.75 [4, 5] |
| Pure        | 70 kVp, 50 mAs  | 3.50 [3, 4] | 4.00 [4, 4] | 4.00 [4, 4] | 3.75 [3, 4] | 4.75 [4, 5] | 5.00 [5, 5] |
| Pure        | 80 kVp, 20 mAs  | 3.00 [3, 3] | 4.00 [4, 4] | 4.25 [4, 5] | 3.25 [3, 4] | 4.25 [4, 5] | 4.50 [4, 5] |
| Pure        | 80 kVp, 50 mAs  | 3.50 [3, 4] | 4.25 [4, 5] | 4.25 [4, 5] | 3.75 [3, 4] | 4.50 [4, 5] | 4.75 [4, 5] |
| Pure        | 100 kVp, 20 mAs | 3.75 [3, 4] | 3.75 [3, 4] | 4.75 [4, 5] | 3.75 [3, 4] | 4.25 [4, 5] | 4.75 [4, 5] |
| Pure        | 100 kVp, 50 mAs | 3.75 [3, 4] | 4.00 [4, 4] | 4.00 [4, 4] | 4.50 [4, 5] | 4.25 [4, 5] | 5.00 [5, 5] |
| Pure        | 120 kVp, 20 mAs | 4.00 [3, 5] | 4.00 [4, 4] | 4.25 [4, 5] | 4.00 [4, 4] | 4.75 [4, 5] | 4.75 [4, 5] |
| Pure        | 120 kVp, 50 mAs | 3.75 [3, 4] | 4.25 [4, 5] | 4.75 [4, 5] | 4.50 [4, 5] | 4.50 [4, 5] | 4.75 [4, 5] |
| Total       | –               | 3.52        | 3.78        | 4.18        | 3.85        | 4.50        | 4.84        |

Evaluation results are expressed as mean [min, max]. \*, CTDI<sub>vol</sub> values were 0.24, 0.63, 0.38, 0.96, 0.61, 1.53, 0.99 and 2.47 mGy for (70 kVp, 20 mAs), (70 kVp, 50 mAs), (80 kVp, 20 mAs), (80 kVp, 50 mAs), (100 kVp, 20 mAs), (100 kVp, 50 mAs), (120 kVp, 20 mAs), and (120 kVp, 50 mAs), respectively. ASiR-V, adaptive statistical iterative reconstruction; DLIR, deep learning-based image reconstruction; CTDI<sub>vol</sub>, computerized tomography dose index volume.

**Table S2** Visual grading analysis to find an appropriate dose level for DLIR images

| Test | Reconstruction mode | kVp | mAs | Radiologist 1 | Radiologist 2 | Radiologist 3 | Radiologist 4 | Mean |
|------|---------------------|-----|-----|---------------|---------------|---------------|---------------|------|
| 1    | DLIR-Low            | 70  | 15  | 2             | 4             | 2             | 1             | 2.25 |
|      |                     |     | 20  | 3             | 4             | 1             | 1             | 2.25 |
|      |                     |     | 25  | 3             | 5             | 1             | 2             | 2.75 |
|      |                     |     | 50  | 4             | 5             | 2             | 3             | 3.50 |
| 2    | DLIR-Low            | 80  | 15  | 2             | 2             | 2             | 1             | 1.75 |
|      |                     |     | 20  | 3             | 3             | 2             | 2             | 2.50 |
|      |                     |     | 25  | 4             | 4             | 3             | 2             | 3.25 |
|      |                     |     | 50  | 5             | 5             | 3             | 3             | 4.00 |
| 3    | DLIR-Low            | 100 | 15  | 3             | 4             | 2             | 3             | 3.00 |
|      |                     |     | 20  | 3             | 4             | 2             | 3             | 3.00 |
|      |                     |     | 25  | 4             | 4             | 2             | 3             | 3.25 |
|      |                     |     | 50  | 5             | 5             | 4             | 3             | 4.25 |
| 4    | DLIR-Low            | 120 | 15  | 3             | 4             | 2             | 3             | 3.00 |
|      |                     |     | 20  | 3             | 4             | 3             | 3             | 3.25 |
|      |                     |     | 25  | 4             | 4             | 3             | 3             | 3.50 |
|      |                     |     | 50  | 4             | 5             | 5             | 4             | 4.50 |
| 5    | DLIR-Medium         | 70  | 15  | 3             | 4             | 1             | 3             | 2.75 |
|      |                     |     | 20  | 3             | 4             | 1             | 3             | 2.75 |
|      |                     |     | 25  | 4             | 5             | 2             | 2             | 3.25 |
|      |                     |     | 50  | 4             | 5             | 2             | 3             | 3.50 |
| 6    | DLIR-Medium         | 80  | 15  | 4             | 3             | 2             | 2             | 2.75 |
|      |                     |     | 20  | 5             | 4             | 2             | 2             | 3.25 |
|      |                     |     | 25  | 5             | 4             | 2             | 3             | 3.50 |
|      |                     |     | 50  | 5             | 5             | 3             | 3             | 4.00 |
| 7    | DLIR-Medium         | 100 | 15  | 4             | 4             | 2             | 3             | 3.25 |
|      |                     |     | 20  | 5             | 4             | 2             | 3             | 3.50 |
|      |                     |     | 25  | 5             | 4             | 3             | 3             | 3.75 |
|      |                     |     | 50  | 5             | 5             | 4             | 3             | 4.25 |
| 8    | DLIR-Medium         | 120 | 15  | 3             | 4             | 2             | 3             | 3.00 |
|      |                     |     | 20  | 4             | 4             | 2             | 3             | 3.25 |
|      |                     |     | 25  | 4             | 4             | 4             | 3             | 3.75 |
|      |                     |     | 50  | 5             | 5             | 5             | 3             | 4.50 |
| 9    | DLIR-High           | 70  | 15  | 4             | 4             | 3             | 2             | 3.25 |
|      |                     |     | 20  | 4             | 4             | 3             | 2             | 3.50 |
|      |                     |     | 25  | 4             | 5             | 2             | 2             | 3.25 |
|      |                     |     | 50  | 5             | 5             | 2             | 3             | 3.75 |
| 10   | DLIR-High           | 80  | 15  | 4             | 4             | 1             | 1             | 2.50 |
|      |                     |     | 20  | 5             | 5             | 1             | 2             | 3.25 |
|      |                     |     | 25  | 5             | 5             | 2             | 2             | 3.50 |
|      |                     |     | 50  | 5             | 5             | 3             | 3             | 4.00 |
| 11   | DLIR-High           | 100 | 15  | 5             | 4             | 3             | 2             | 3.50 |
|      |                     |     | 20  | 5             | 4             | 2             | 3             | 3.50 |
|      |                     |     | 25  | 5             | 5             | 2             | 3             | 3.75 |
|      |                     |     | 50  | 5             | 5             | 3             | 3             | 4.00 |
| 12   | DLIR-High           | 120 | 15  | 5             | 4             | 3             | 3             | 3.75 |
|      |                     |     | 20  | 5             | 4             | 4             | 3             | 4.00 |
|      |                     |     | 25  | 5             | 5             | 4             | 3             | 4.25 |
|      |                     |     | 50  | 5             | 5             | 5             | 3             | 4.50 |

DLIR, deep learning-based image reconstruction.
